# Supplementary material
Source: ML conference proceedings conference paper supplement (https://openreview.net/forum?id=5YLsnsjgeC)
Supplement: supplementary_material [file attachment]

Step 1: Extract the files from the folder.

Step 2: Reproduce the results in Table 2 of the paper by running the following command:

***python cal\_metrics\_from\_pt.py***

| Methods    | Vina Score(↓) |              | Vina Min (↓) |              | Vina Dock (↓) |              | High Affinity(↑) |              | QED(↑)      |             | SA(↑)       |             | Diversity(↑) |             |
|------------|---------------|--------------|--------------|--------------|---------------|--------------|------------------|--------------|-------------|-------------|-------------|-------------|--------------|-------------|
|            | Avg.          | Med.         | Avg.         | Med.         | Avg.          | Med.         | Avg.             | Med.         | Avg.        | Med.        | Avg.        | Med.        | Avg.         | Med.        |
| liGAN      | -             | -            | -            | -            | -6.33         | -6.20        | 21.1%            | 11.1%        | 0.39        | 0.39        | 0.59        | 0.57        | 0.66         | 0.67        |
| GraphBP    | -             | -            | -            | -            | -4.80         | -4.70        | 14.2%            | 6.7%         | 0.43        | 0.45        | 0.49        | 0.48        | <b>0.79</b>  | <b>0.78</b> |
| AR         | -5.75         | -5.64        | -6.18        | -5.88        | -6.75         | -6.62        | 37.9%            | 31.0%        | 0.51        | 0.50        | <u>0.63</u> | <u>0.63</u> | 0.70         | 0.70        |
| Pocket2Mol | -5.14         | -4.70        | -6.42        | -5.82        | -7.15         | -6.79        | 48.4%            | 51.0%        | <b>0.56</b> | <b>0.57</b> | <b>0.74</b> | <b>0.75</b> | 0.69         | 0.71        |
| TargetDiff | -5.47         | -6.30        | -6.64        | -6.83        | -7.80         | -7.91        | 58.1%            | 59.1%        | 0.48        | 0.48        | 0.58        | 0.58        | 0.72         | 0.71        |
| DecompDiff | -5.67         | -6.04        | -7.04        | -7.09        | -8.39         | -8.43        | 64.4%            | 71.0%        | 0.45        | 0.43        | 0.61        | 0.60        | 0.68         | 0.68        |
| IRDiff     | -6.03         | -6.89        | -7.27        | -7.37        | -8.42         | -8.42        | 67.4%            | 72.7%        | 0.53        | 0.54        | 0.59        | 0.58        | 0.72         | 0.72        |
| IPDiff     | <u>-6.42</u>  | <u>-7.01</u> | <u>-7.45</u> | <u>-7.48</u> | <u>-8.57</u>  | <u>-8.51</u> | <u>69.5%</u>     | <u>75.5%</u> | 0.52        | 0.53        | 0.61        | 0.59        | <u>0.74</u>  | <u>0.73</u> |
| VFDiff     | <b>-7.37</b>  | <b>-7.75</b> | <b>-8.18</b> | <b>-8.18</b> | <b>-8.77</b>  | <b>-8.72</b> | <b>69.5%</b>     | <b>75.5%</b> | <u>0.54</u> | <u>0.55</u> | 0.57        | 0.57        | 0.72         | 0.71        |
| Reference  | -6.36         | -6.41        | -6.71        | -6.49        | -7.45         | -7.26        | -                | -            | 0.48        | 0.47        | 0.73        | 0.74        | -            | -           |

Step 3: You can visualize the protein-ligand complexes you want to examine by running the notebook.
